# Supplementary material for: AMPA/kainate glutamate receptor antagonists prevent posttraumatic osteoarthritis
Source: JCI journal article supplement (doi:10.1172/jci.insight.134055), 2020-06-16
Supplement: sd1 [file 1]

### **Supplementary materials.**

Supplementary figure 1. (A) Two injections significantly reduce joint severity scores compared to a single injection following ACLr (n=5 per treatment, \*p<0.05, GLM). (B) When broken down into parameters, 2 doses of NBQX significantly reduced scores compared to 2 doses of sH<sub>2</sub>O vehicle (n=5 per treatment\*\*p<0.01, GLM). (C) Knee swelling and (D) lameness score over time, and (E) day 21 histological inflammation, were not affected by NBQX dosing regimen in ACL ruptured mice (n=5 per treatment). (F&G) Numbers of AMPAR2 positive cells (presented as a percentage of total cells counted in the ACL) were similar for ruptured ACL and intact ACL, however, numbers of KA1 positive cells (H&I) were lower in intact-ACL compared to ruptured ACL, significantly lower when compared to 2 doses of vehicle or NBQX (I, \*p<0.05, one-way ANOVA, tukey post-hoc). Data presented as mean ±SD in C & D and boxplots representing interquartile range, median and all data points (including mean, indicated by crossed circle) in A, B & E-I.

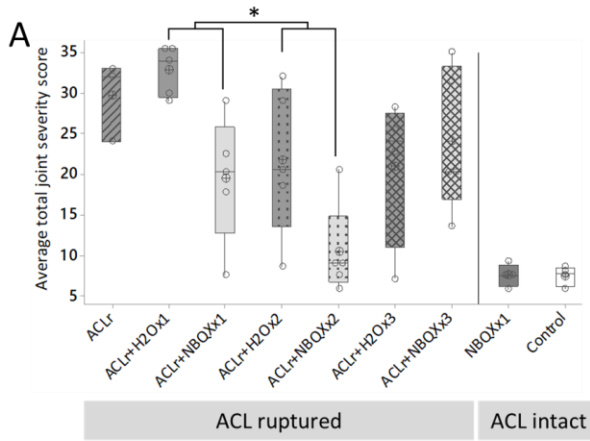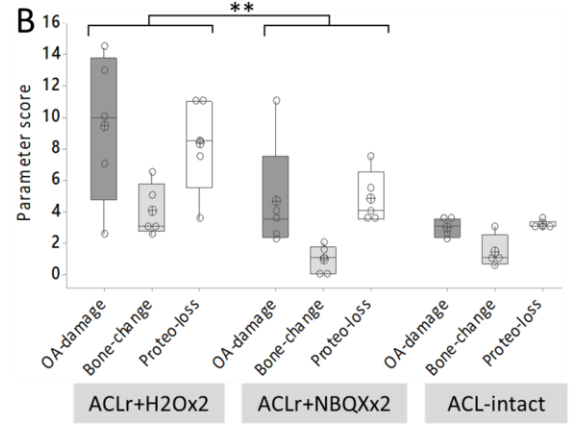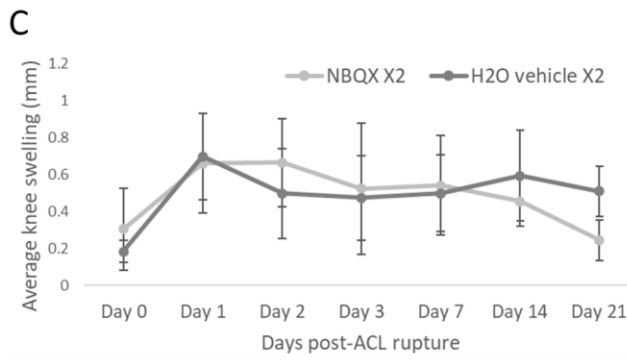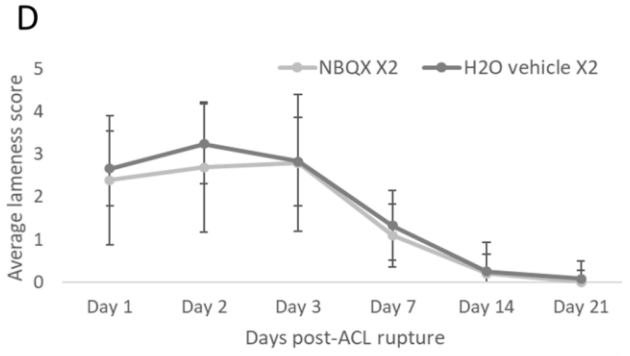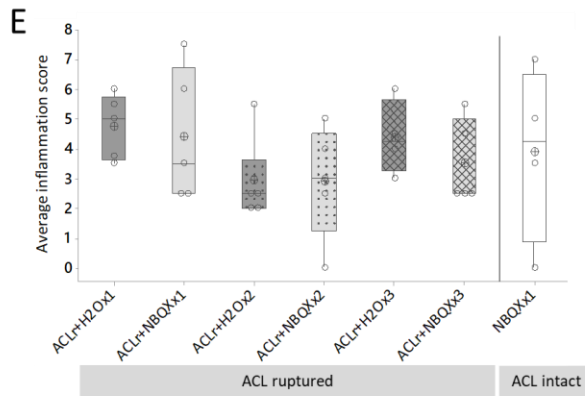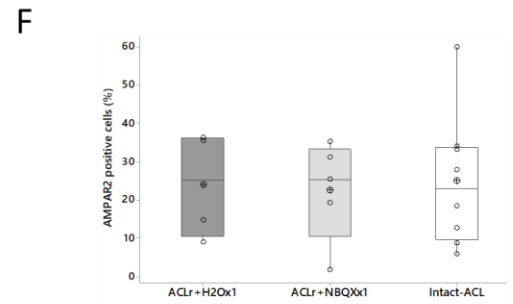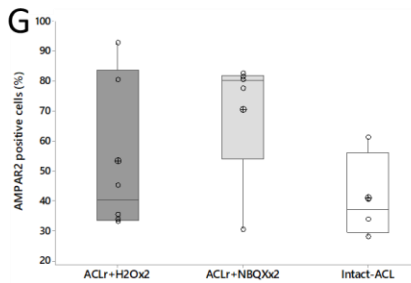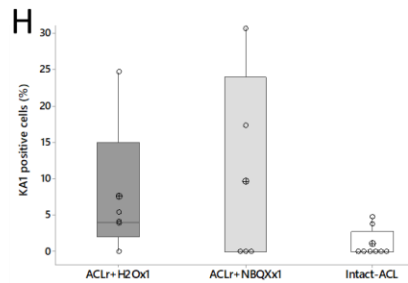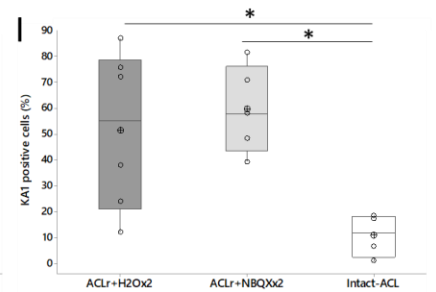

## **SUPPLEMENTARY METHODS.**

### **Antibody details and immunohistochemistry technique.**

Anti-iGluR2 recognises the phosphorylation site of serine 880 in the GluR2 protein (I-E-S-V-K). This amino acid sequence is present in both human and rat GluR2 protein. Anti-KA1 recognises a sequence within the last 50 amino acids of the human KA1 protein (exact sequence is unknown as it is proprietary knowledge). The manufactures state that this antibody also reacts with rat KA1, which shares 98% homology with the last 50 amino acids of the human KA1 amino acid sequence.

Anti-iGluR2 was used at 10µg/ml and anti-KA1 at 2.5µg/ml in human and rat immunohistochemistry. For human samples, antigen retrieval was carried out using 1mg/ml trypsin for 20 minutes at 37°C followed by 1000U/ml hyaluronidase for 30 minutes at 37°C. For rat samples, 1mg/ml trypsin for 20 minutes at 37°C was used.

For all samples the following method was used:

Sections were deparaffinised and rehydrated prior to antigen retrieval (as stated above). Endogenous peroxidase activity was blocked with 0.3% hydrogen peroxide (Sigma) for 30 minutes followed by 3 washes in 1XTBS/0.1% tween for 15 minutes each. Sections were subsequently treated with 10% normal blocking serum (Sigma) for 1 hour prior to overnight incubation at 4°C with primary antibody, followed by 3 washes in 1XTBS/0.1% tween. Immunostaining was detected using the rabbit VECTASTAIN ELITE ABC horseradish peroxidase kit (Vector Laboratories). Biotinylated secondary antibody was applied and incubated for 30 minutes followed by three 5 minute 1XTBS washes. Avidin-biotin complex (ABC) was added for 30 minutes followed by three 5 minute 1XTBS washes. Sections were developed using nickel enhanced

diaminobenzidine (DAB) (Vector Laboratories), counterstained in Mayer's haematoxylin (Fisher Scientific), and blued in tap water. Sections were finally dehydrated, cleared in xylene and mounted. Slides were viewed on a Leica DMRB microscope. All incubations were at room temperature unless otherwise stated.

**Supplementary table 1. Patient details.**

| ID   | Use in study    | Glutamate conc (umol/L) | Weeks post injury | Weight (kg) | Height (cm) | BMI  | Pathology          | Age at surgery | Sex    |
|------|-----------------|-------------------------|-------------------|-------------|-------------|------|--------------------|----------------|--------|
| 483  | Glutamate conc. | 71.094                  | 17                |             |             |      | ACL reconstruction | 29             | male   |
| 445  | Glutamate conc. | 19.924                  | 275               |             |             |      | ACL reconstruction | 55             | female |
| 518  | Glutamate conc. | 54.74                   | 37                | 92          | 180         | 28   | ACL reconstruction | 33             | male   |
| 649  | Glutamate conc. | 96.186                  | 10                | 83          | 171         | 29   | ACL reconstruction | 20             | male   |
| 266  | Glutamate conc. | 52.496                  | 134               | 77          | 180         | 25   | ACL reconstruction | 33             | male   |
| 952  | Glutamate conc. | 34.714                  | 10                | 71          |             |      | ACL reconstruction | 24             | female |
| 1170 | Glutamate conc. | 81.464                  |                   |             |             |      | ACL reconstruction |                | male   |
| 1789 | Glutamate conc. | 66.3                    | 361               | 103         | 185         | 30   | ACL reconstruction | 32             | male   |
| 1808 | Glutamate conc. | 61.71                   | 14                | 78          | 173         | 26   | ACL reconstruction | 38             | male   |
| 1817 | Glutamate conc. | 56.78                   | 14                | 86          | 168         | 29   | ACL reconstruction | 32             | female |
| 1842 | Glutamate conc. | 45.458                  | 14                | 81          | 183         | 25   | ACL reconstruction | 18             | male   |
| 1928 | Glutamate conc. | 61.268                  | 40                | 87          | 177         | 27.8 | ACL reconstruction | 19             | male   |
| 2011 | Glutamate conc. | 43.248                  | 13                | 75          | 168         | 27   | ACL reconstruction | 33             | female |
| 874  | Glutamate conc. | 45.73                   | 47                |             |             |      | ACL reconstruction | 30             | male   |
| 895  | Glutamate conc. | 129.098                 | 74                | 60          | 160         | 23   | ACL reconstruction | 22             | male   |
| 1596 | Glutamate conc. | 49.538                  | 161               |             |             |      | ACL reconstruction | 22             | female |
| 1708 | Glutamate conc. | 37.74                   | 14                |             |             |      | ACL reconstruction | 17             | male   |
| 1768 | Glutamate conc. | 19.618                  | 524               |             |             |      | ACL reconstruction | 26             | male   |
| 1841 | Glutamate conc. | 44.336                  | 7                 | 68          | 173         | 23   | ACL reconstruction | 21             | male   |
| 1874 | Glutamate conc. | 21.08                   | 383               |             |             |      | ACL reconstruction | 37             | male   |

|      |                          |        |     |      |     |    |                    |    |        |
|------|--------------------------|--------|-----|------|-----|----|--------------------|----|--------|
| 1899 | Glutamate conc.          | 74.086 | 14  |      |     |    | ACL reconstruction | 26 | male   |
| 1934 | Glutamate conc.          | 71.604 | 19  | 80   | 180 | 25 | ACL reconstruction | 24 | female |
| 1944 | Glutamate conc.          | 75.82  | 20  | 84.5 | 185 | 24 | ACL reconstruction | 22 | male   |
| 2001 | Glutamate conc.          | 99.076 | 27  | 92   | 175 | 30 | ACL reconstruction | 22 | male   |
| 2031 | Glutamate conc.          | 65.314 | 35  | 73   | 175 | 24 | ACL reconstruction | 17 | male   |
| 2355 | Immuno & glutamate conc. | 66.266 | 48  | 77   | 175 | 25 | ACL reconstruction | 32 | male   |
| 2357 | Immuno & glutamate conc. | 15.198 | 156 | 61   | 178 | 19 | ACL reconstruction | 19 | male   |
| 2358 | Immuno & glutamate conc. | 43.622 | 61  | 57   | 150 | 25 | ACL reconstruction | 22 | female |
| 970  | Glutamate conc.          | 88.4   |     | 109  | 183 | 33 | ACL reconstruction | 38 | male   |
| 2362 | Immuno & glutamate conc. | 25.908 |     | 98   | 180 | 30 | OA TKR             | 73 | male   |
| 2361 | Immuno & glutamate conc. | 24.208 | 30  | 76   | 175 | 25 | OA TKR             | 81 | male   |
| 2360 | Immuno & glutamate conc. | 30.6   | 130 | 87   | 165 | 31 | OA TKR             | 64 | female |
| 1882 | Glutamate conc.          | 75.344 |     |      |     |    | OA TKR             |    | male   |
| 1680 | Glutamate conc.          | 39.746 |     |      |     |    | OA TKR             |    | Female |
| 2364 | Immuno & glutamate conc. | 28.22  | 15  | 65   | 165 | 24 | Men. Arthroscopy   | 51 | female |
| 2365 | Immuno & glutamate conc. | 99.518 | 56  |      |     |    | Men. Arthroscopy   | 66 | female |
| 1795 | Glutamate conc.          | 22.984 |     |      |     |    | Men. Arthroscopy   | 63 | male   |
| 1911 | Glutamate conc.          | 24.65  |     | 105  | 178 | 33 | Men. Arthroscopy   | 39 | male   |
| 1972 | Glutamate conc.          | 40.29  |     | 56   | 160 | 22 | Men. Arthroscopy   | 42 | female |

|      |                 |        |  |  |  |  |        |  |        |
|------|-----------------|--------|--|--|--|--|--------|--|--------|
| 1678 | Glutamate conc. | 79.322 |  |  |  |  | RA TKR |  | male   |
| 1617 | Glutamate conc. | 54.026 |  |  |  |  | RA TKR |  | female |

**Supplementary table 2.**

Mouse synovial inflammation scoring system (61).

| Component                 | Sub-component                                                                                           | Grade |
|---------------------------|---------------------------------------------------------------------------------------------------------|-------|
| Sub-synovial inflammation | Normal (adipose tissue appears normal, no infiltrate).                                                  | 0     |
|                           | Focal inflammatory infiltrates, adiposity hardly affected (10% inflammatory cells, 90% adipose tissue). | 1     |
|                           | Random inflammatory infiltrate equals adiposity (50% inflammatory cells, 50% adipose tissue).           | 2     |
|                           | Inflammatory infiltrate dominating tissue (70% inflammatory cells, 30% adipose tissue).                 | 3     |
|                           | Substantial infiltrate with severe loss of adiposity (90% inflammatory cells, 10% adipose tissue).      | 4     |
|                           | Ablation of adiposity due to infiltrate (100% inflammatory cells, 0% adipose tissue).                   | 5     |
| Synovial exudate          | Normal                                                                                                  | 0     |
|                           | Evidence of inflammatory cells in joint space.                                                          | 1     |



|                                           |                                                                                                   |      |
|-------------------------------------------|---------------------------------------------------------------------------------------------------|------|
|                                           | Moderate numbers of inflammatory cells in joint space, possibly with evidence of fibrin deposits. | 2    |
|                                           | Substantial numbers of inflammatory cells with large fibrin deposits.                             | 3    |
| Synovial hyperplasia and pannus formation | Normal, 1-3 layers thick.                                                                         | 0    |
|                                           | Over three layers thick.                                                                          | 1    |
|                                           | Over three layers thick with some overgrowth over joint surfaces.                                 | 2    |
|                                           | Over three layers thick with overgrowth over joint surfaces and evidence of cartilage loss.       | 3    |
| Total score                               |                                                                                                   | 0-14 |

---

**Supplementary table 3.**

Mouse knee degeneration scoring system (62).

| Parameter                   | Sub-parameter                                                                                             | Grade |
|-----------------------------|-----------------------------------------------------------------------------------------------------------|-------|
| Osteoarthritic<br>Damage    | Normal                                                                                                    | 0     |
|                             | Loss of toluidine blue                                                                                    | 0.5   |
|                             | Small fibrillations without loss of cartilage                                                             | 1     |
|                             | Vertical clefts down to the layer immediately below the superficial layer and some loss of surface lamina | 2     |
|                             | Vertical clefts/ erosion to the calcified cartilage extending to <25% of the articular surface            | 3     |
|                             | Vertical clefts/ erosion to the calcified cartilage extending to 25-50% of the articular surface          | 4     |
|                             | Vertical clefts/ erosion to the calcified cartilage extending to 50-75% of the articular surface          | 5     |
|                             | Vertical clefts/ erosion to the calcified cartilage extending to >75% of the articular surface            | 6     |
| Subchondral<br>Bone Changes | Normal                                                                                                    | 0     |
|                             | Mild                                                                                                      | 1     |

|                      |                                                                                                                      |   |
|----------------------|----------------------------------------------------------------------------------------------------------------------|---|
|                      | Moderate                                                                                                             | 2 |
|                      | Severe                                                                                                               | 3 |
| Loss of Proteoglycan | Normal staining of non-calcified cartilage                                                                           | 0 |
|                      | Decreased but not complete loss of Toluidine blue staining over 1-100% of the articular cartilage                    | 1 |
|                      | Complete loss of Toluidine blue staining in the non-calcified cartilage extending to <25% of the articular surface   | 2 |
|                      | Complete loss of Toluidine blue staining in the non-calcified cartilage extending to 25-50% of the articular surface | 3 |
|                      | Complete loss of Toluidine blue staining in the non-calcified cartilage extending to 50-75% of the articular surface | 4 |
|                      | Complete loss of Toluidine blue staining in the non-calcified cartilage extending to >75% of the articular surface   | 5 |
